# Supplementary material for: A Model-Based Analysis of GC-Biased Gene Conversion in the Human and Chimpanzee Genomes
Source: PubMed Central journal article supplement (PMC3744432; doi:10.1371/journal.pgen.1003684), 2013-08-15

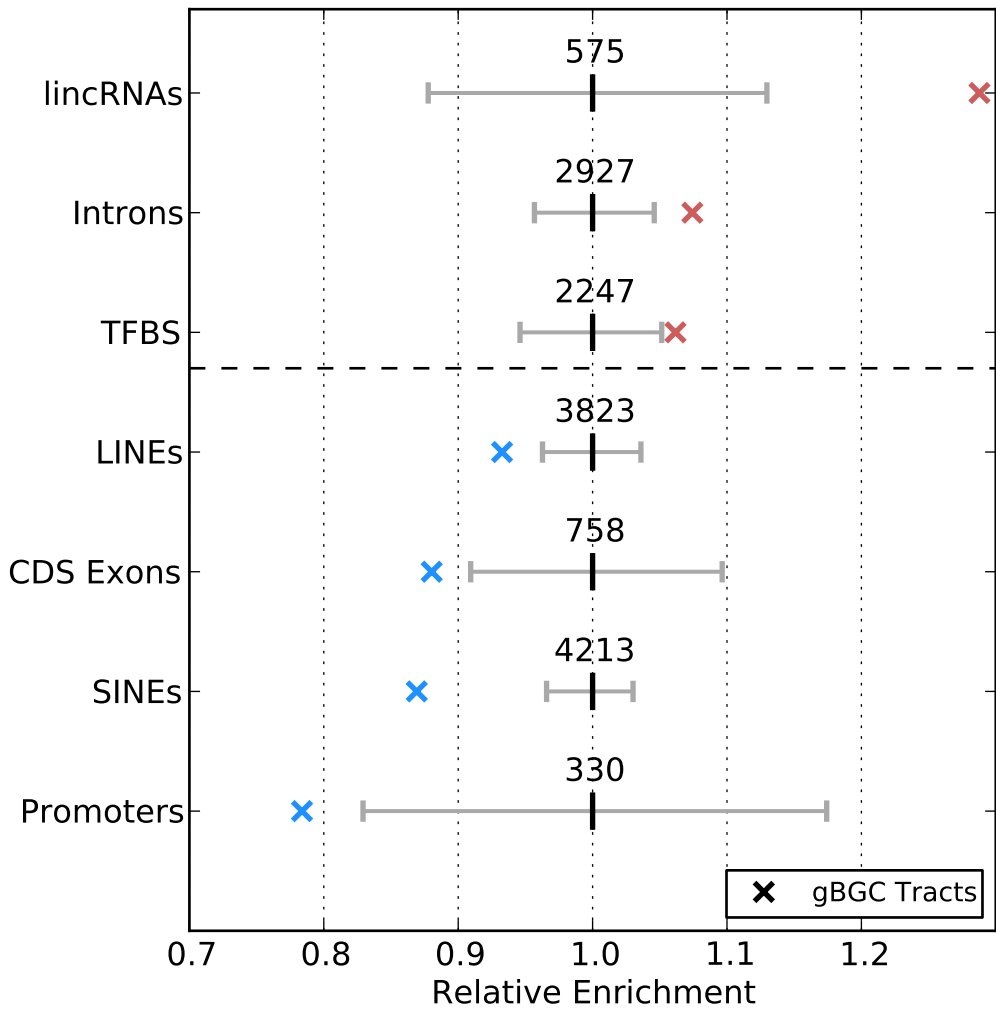

Supplement: pgen.1003684.s010.pdf [file pgen.1003684.s010.pdf]
