# Supplementary material for: A Model-Based Analysis of GC-Biased Gene Conversion in the Human and Chimpanzee Genomes
Source: PubMed Central journal article supplement (PMC3744432; doi:10.1371/journal.pgen.1003684), 2013-08-15
Supplement: pgen.1003684.s017.pdf [file pgen.1003684.s017.pdf]

|                    | <b><i>B=2</i></b> | <b><i>B=3</i></b> | <b><i>B=4</i></b> | <b><i>B=5</i></b> | <b><i>B=10</i></b> |
|--------------------|-------------------|-------------------|-------------------|-------------------|--------------------|
| <b><i>B=2</i></b>  | 1                 | 0.97              | 0.95              | 0.93              | 0.88               |
| <b><i>B=3</i></b>  | 0.29              | 1                 | 0.98              | 0.97              | 0.92               |
| <b><i>B=4</i></b>  | 0.19              | 0.64              | 1                 | 0.99              | 0.94               |
| <b><i>B=5</i></b>  | 0.13              | 0.46              | 0.72              | 1                 | 0.95               |
| <b><i>B=10</i></b> | 0.06              | 0.20              | 0.31              | 0.44              | 1                  |

Table S1: **Relative Coverage of Human gBGC Tracts for Various Values of  $B$ .** Each value in the table represents the fraction of nucleotides in the human gBGC tract predictions for the value of  $B$  indicated for the row that also fall in the predictions for the value of  $B$  indicated for the column. The numbers on the main diagonal are one by definition. The numbers above the main diagonal indicate the coverage of smaller sets (higher  $B$ ) by larger sets (lower  $B$ ), while the numbers below the main diagonal indicate the coverage of larger sets by smaller sets.
